# Supplementary material
Source: PubMed Central journal article supplement (PMC9852065)

# Supplemental Figure 1

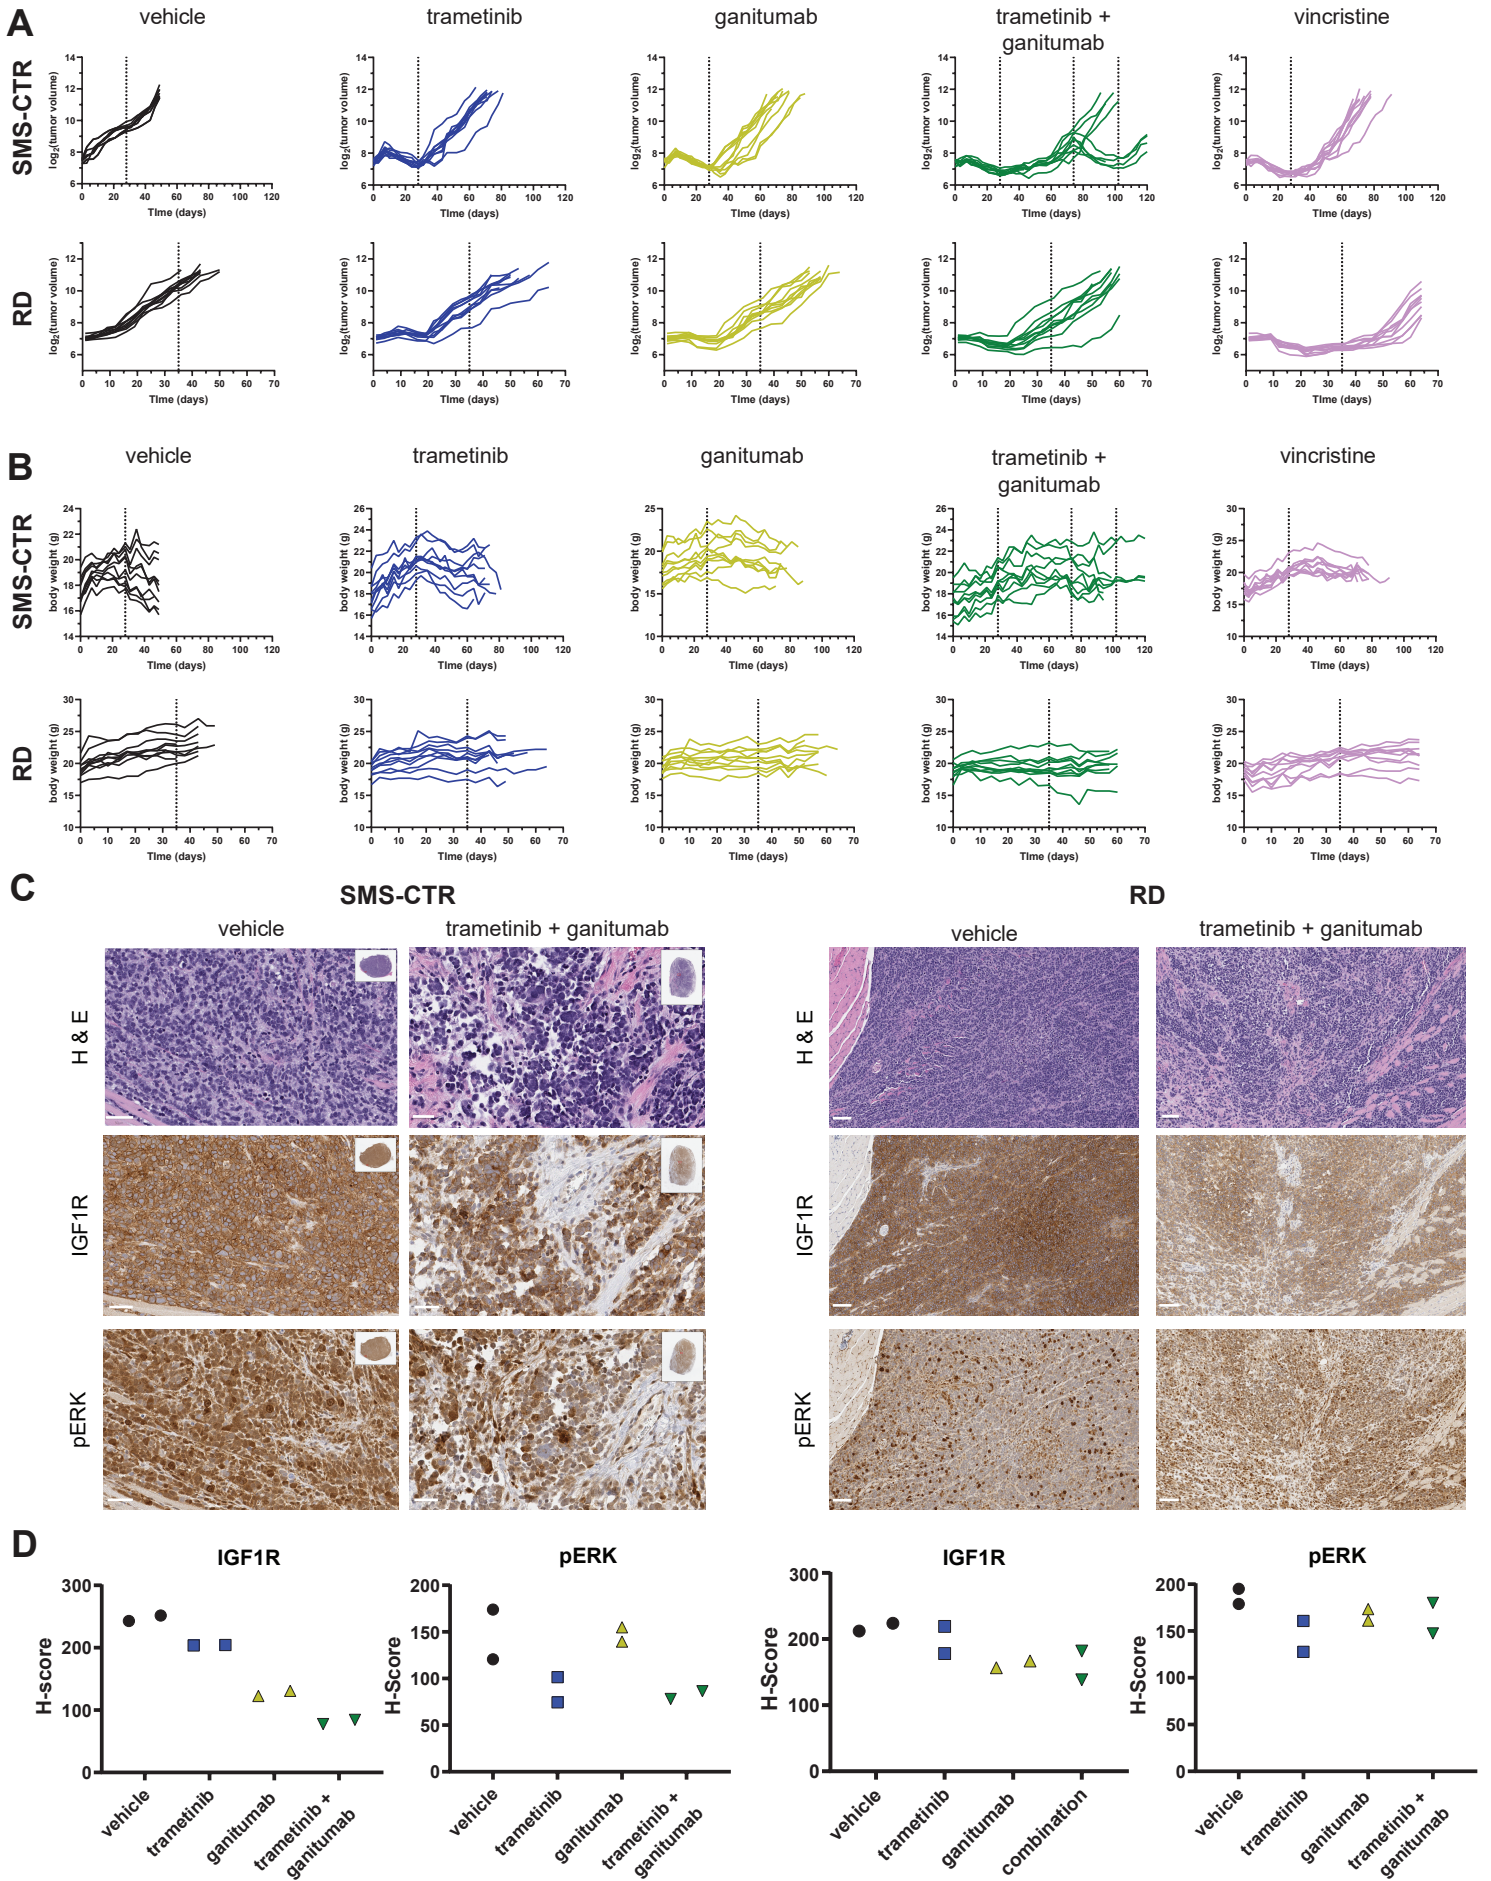

Supplement: NIHMS1848937-supplement-Supplementary_Figure_1.pdf [file NIHMS1848937-supplement-Supplementary_Figure_1.pdf]

# Supplemental Figure 2

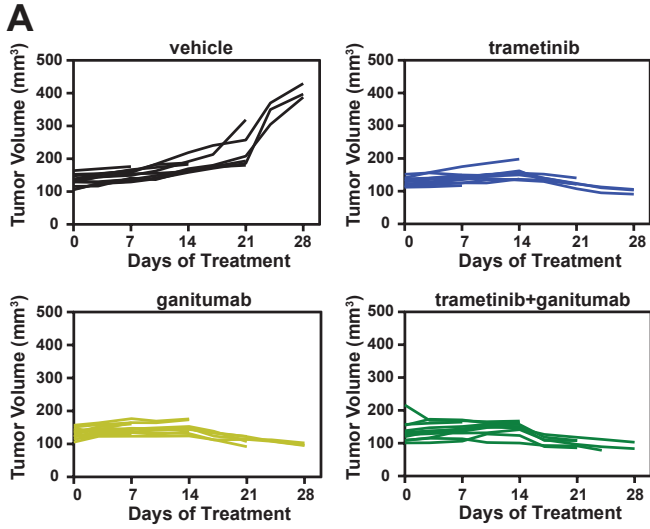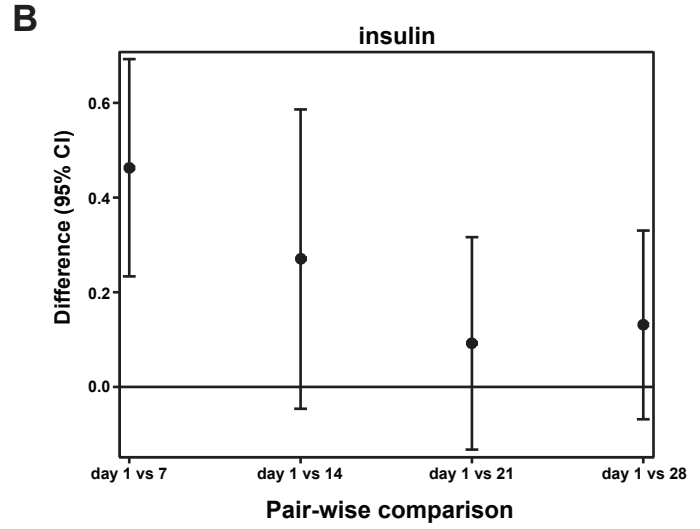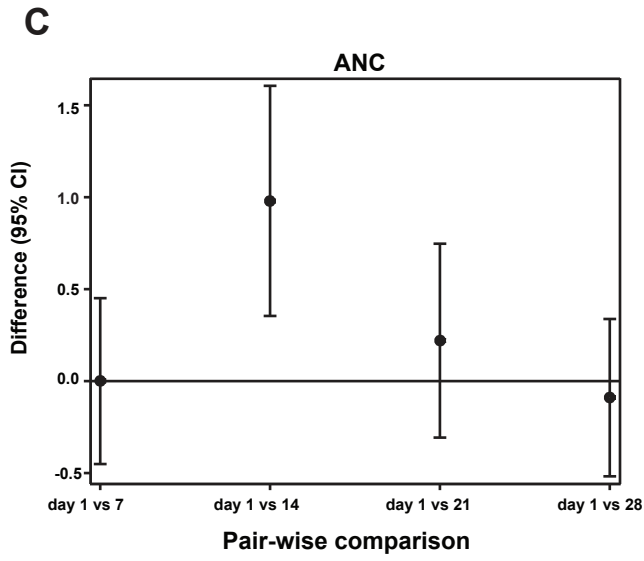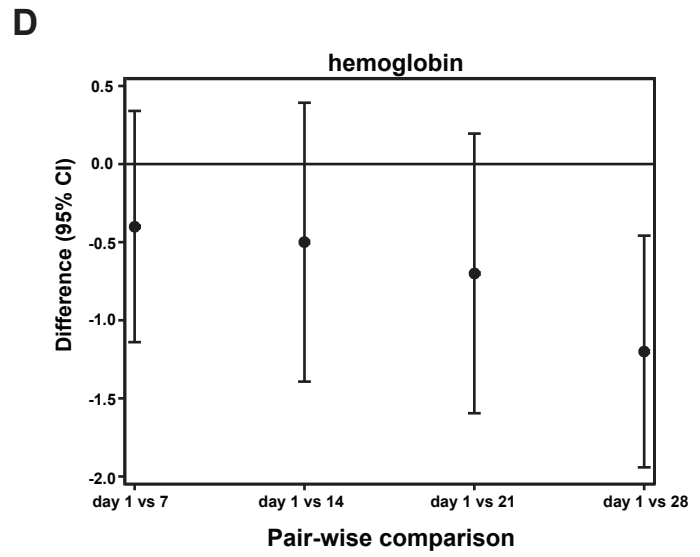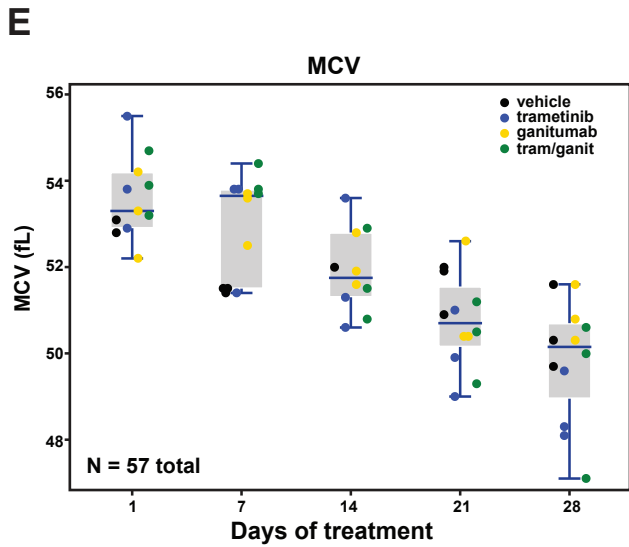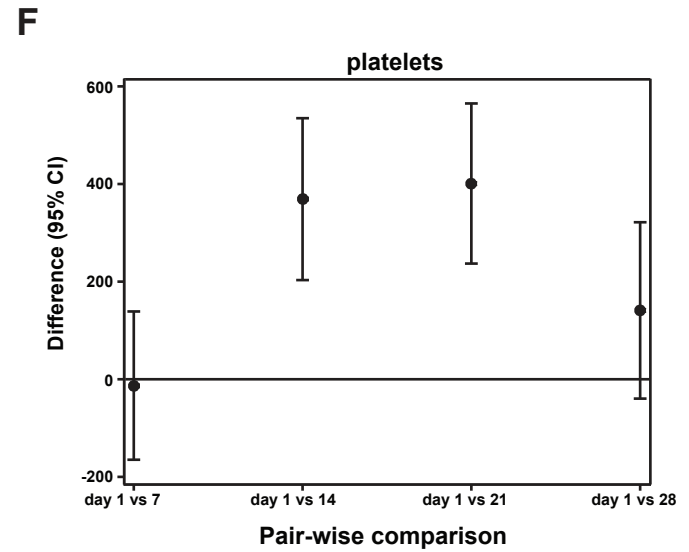

Supplement: NIHMS1848937-supplement-Supplementary_Figure_2.pdf [file NIHMS1848937-supplement-Supplementary_Figure_2.pdf]

# Supplemental Figure 3

**A**

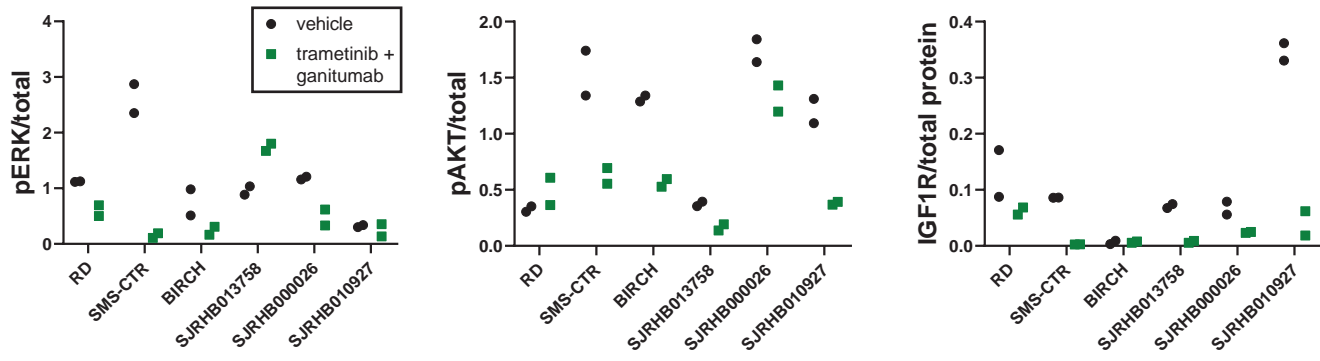

**B** SJRHB013758

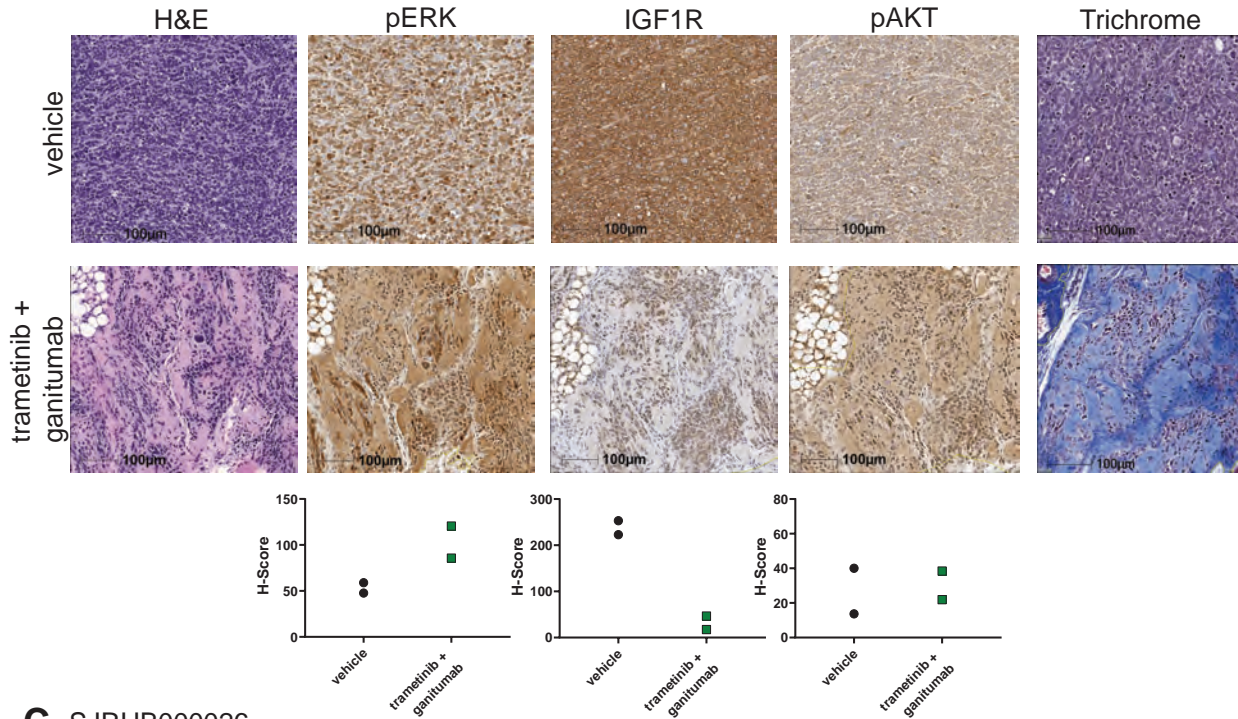

**C** SJRHB000026

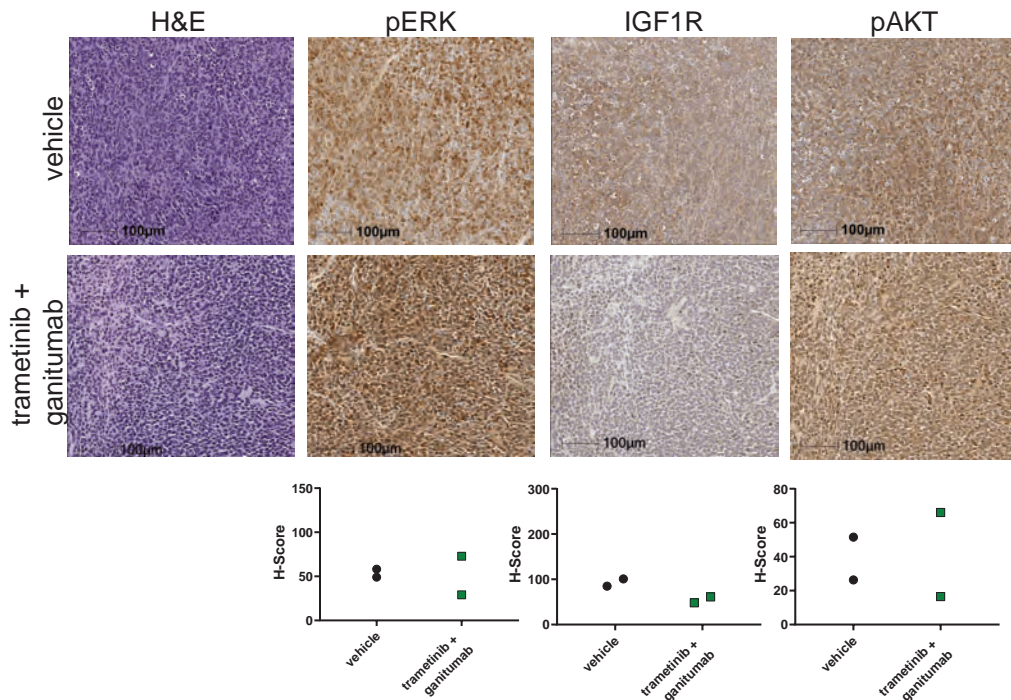

Supplement: NIHMS1848937-supplement-Supplementary_Figure_3.pdf [file NIHMS1848937-supplement-Supplementary_Figure_3.pdf]

# Supplemental Figure 4

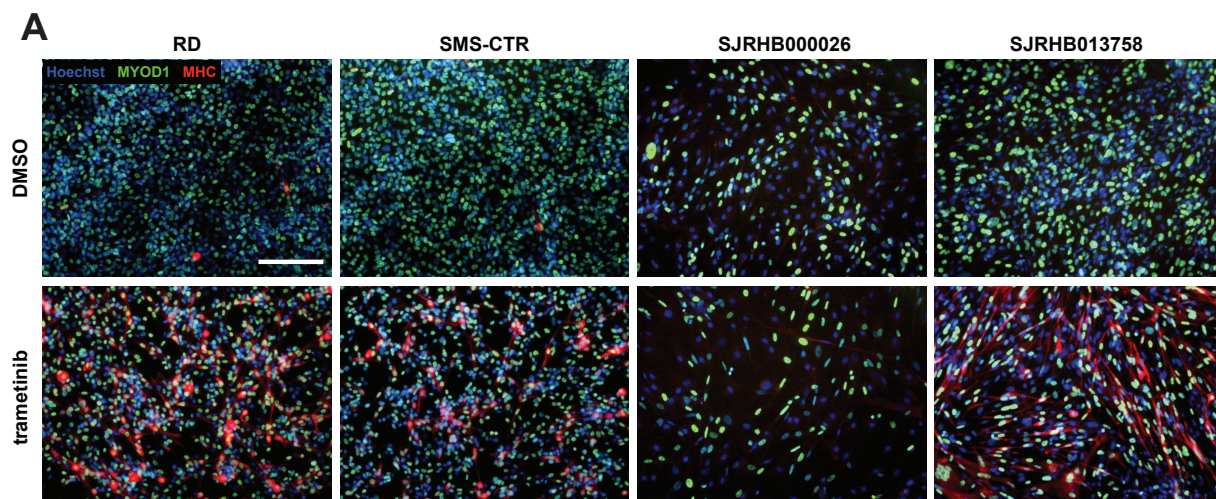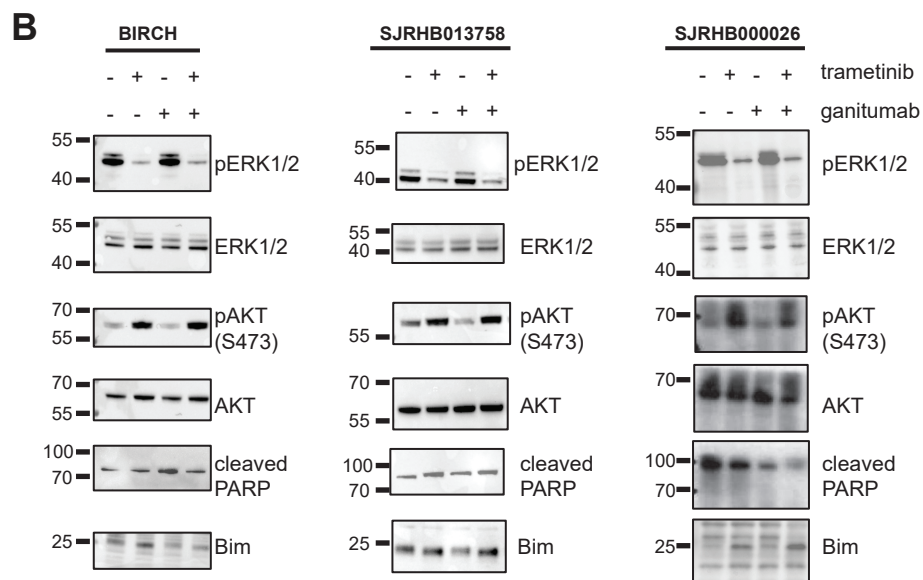

Supplement: NIHMS1848937-supplement-Supplementary_Figure_4.pdf [file NIHMS1848937-supplement-Supplementary_Figure_4.pdf]

# Supplemental Figure 5

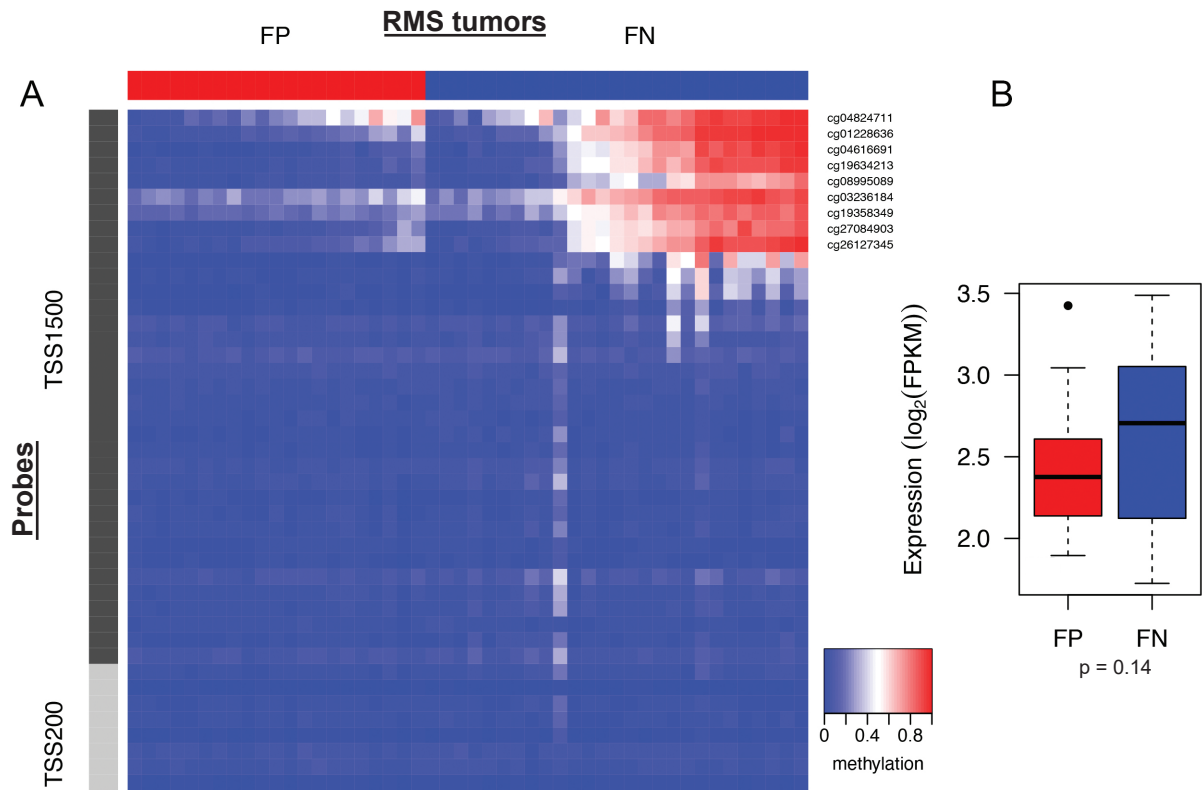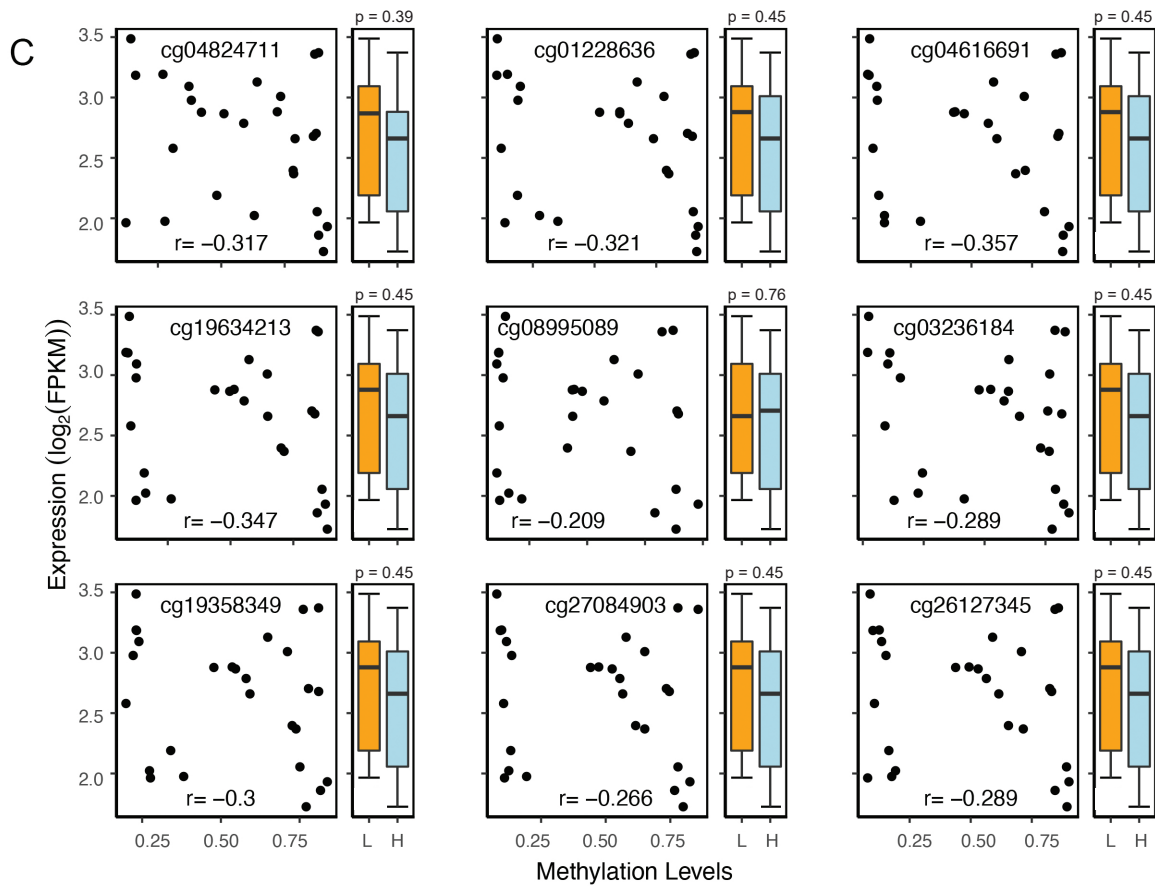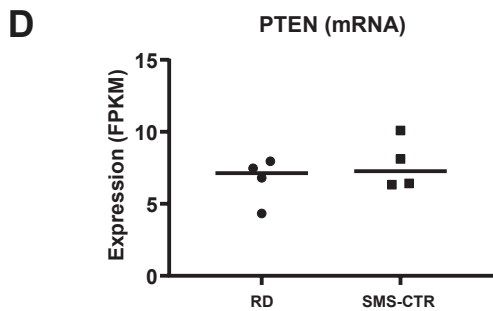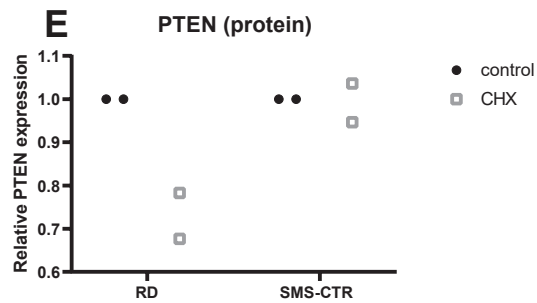

Supplement: NIHMS1848937-supplement-Supplementary_Figure_5.pdf [file NIHMS1848937-supplement-Supplementary_Figure_5.pdf]

# Supplemental Figure 6

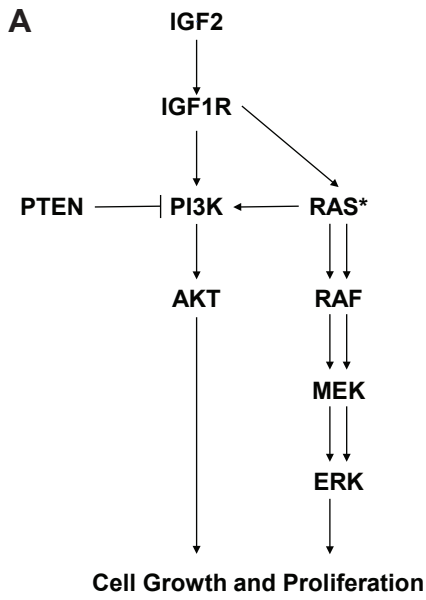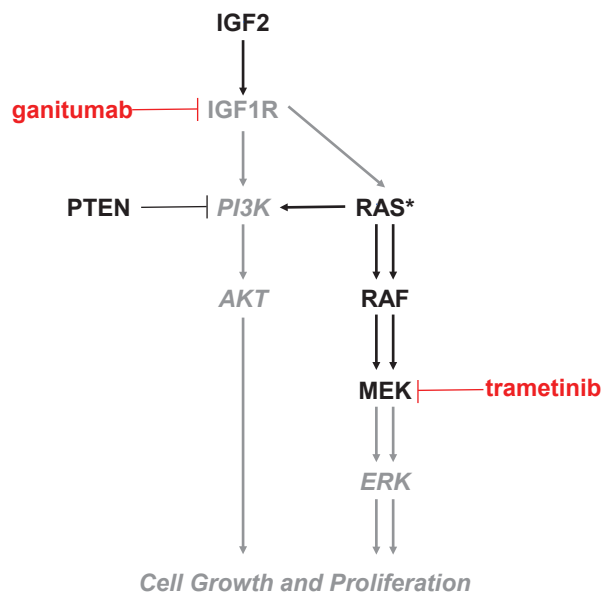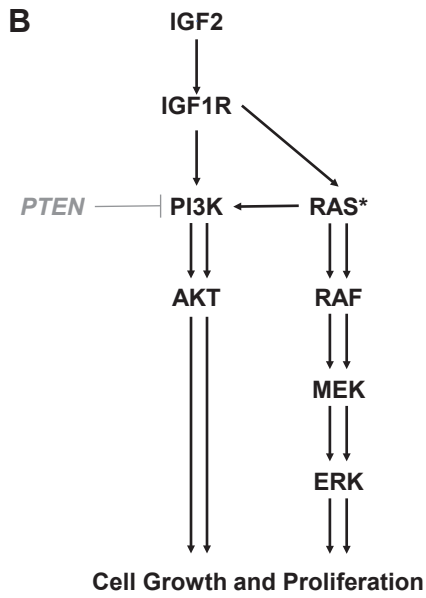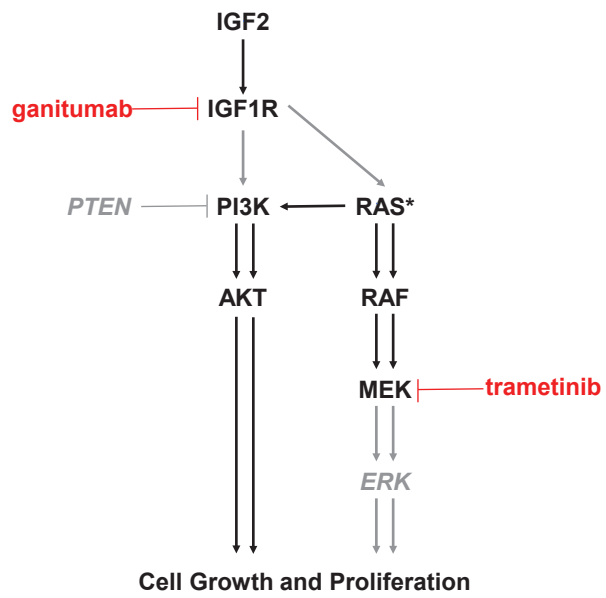

Supplement: NIHMS1848937-supplement-Supplementary_Figure_6.pdf [file NIHMS1848937-supplement-Supplementary_Figure_6.pdf]
